# Supplementary material for: RNA sequencing-based approaches to identifying disulfidptosis-related diagnostic clusters and immune landscapes in osteoporosis
Source: publisher site journal article supplement (doi:10.18632/aging.205813), 2024-05-10
Supplement: Supplementary file [file aging-v16i9-205813-supplementary-material-SD1.pdf]

## SUPPLEMENTARY TABLES

**Supplementary Table 1. The detailed information of GO enrichment analysis in Figure 2J.**

| ONTOLOGY | ID         | Description                                                        | p-value     | p.adjust    |
|----------|------------|--------------------------------------------------------------------|-------------|-------------|
| BP       | GO:0070527 | platelet aggregation                                               | 1.04E-06    | 0.000432302 |
| BP       | GO:0034109 | homotypic cell-cell adhesion                                       | 2.72E-06    | 0.000432302 |
| BP       | GO:0007596 | blood coagulation                                                  | 3.46E-06    | 0.000432302 |
| BP       | GO:0007599 | hemostasis                                                         | 3.66E-06    | 0.000432302 |
| BP       | GO:0050817 | coagulation                                                        | 3.71E-06    | 0.000432302 |
| BP       | GO:0051668 | localization within membrane                                       | 1.67E-05    | 0.001535649 |
| BP       | GO:0030168 | platelet activation                                                | 1.84E-05    | 0.001535649 |
| BP       | GO:0001894 | tissue homeostasis                                                 | 5.99E-05    | 0.004364239 |
| BP       | GO:0034329 | cell junction assembly                                             | 7.16E-05    | 0.004635332 |
| BP       | GO:1900026 | positive regulation of substrate adhesion-dependent cell spreading | 7.98E-05    | 0.004649556 |
| CC       | GO:0098978 | glutamatergic synapse                                              | 0.000182539 | 0.004467089 |
| CC       | GO:0005925 | focal adhesion                                                     | 0.000283152 | 0.004467089 |
| CC       | GO:0005924 | cell-substrate adherens junction                                   | 0.000289373 | 0.004467089 |
| CC       | GO:0030055 | cell-substrate junction                                            | 0.000297806 | 0.004467089 |
| CC       | GO:0042470 | melanosome                                                         | 0.00059076  | 0.005301481 |
| CC       | GO:0048770 | pigment granule                                                    | 0.00059076  | 0.005301481 |
| CC       | GO:0005884 | actin filament                                                     | 0.000647536 | 0.005301481 |
| CC       | GO:0030863 | cortical cytoskeleton                                              | 0.000706864 | 0.005301481 |
| CC       | GO:0044448 | cell cortex part                                                   | 0.001763774 | 0.011758497 |
| CC       | GO:0036464 | cytoplasmic ribonucleoprotein granule                              | 0.002332005 | 0.013992032 |
| MF       | GO:0030957 | Tat protein binding                                                | 0.003949442 | 0.043175984 |
| MF       | GO:0004312 | fatty acid synthase activity                                       | 0.00434365  | 0.043175984 |
| MF       | GO:0031996 | thioesterase binding                                               | 0.00434365  | 0.043175984 |
| MF       | GO:0099186 | structural constituent of postsynapse                              | 0.00434365  | 0.043175984 |
| MF       | GO:0005313 | L-glutamate transmembrane transporter activity                     | 0.005525471 | 0.043175984 |
| MF       | GO:0015172 | acidic amino acid transmembrane transporter activity               | 0.005525471 | 0.043175984 |
| MF       | GO:0050998 | nitric-oxide synthase binding                                      | 0.005525471 | 0.043175984 |
| MF       | GO:0017160 | Ral GTPase binding                                                 | 0.005919144 | 0.043175984 |
| MF       | GO:0072349 | modified amino acid transmembrane transporter activity             | 0.005919144 | 0.043175984 |
| MF       | GO:0098918 | structural constituent of synapse                                  | 0.00670609  | 0.043175984 |

**Supplementary Table 2. The detailed information of KEGG enrichment analysis in Figure 2K.**

| <b>Term</b>                             | <b>p-value</b> | <b>p.adjust</b> |
|-----------------------------------------|----------------|-----------------|
| Focal adhesion                          | 3.40E-05       | 0.001225119     |
| Proteoglycans in cancer                 | 3.60E-05       | 0.001225119     |
| Salmonella infection                    | 6.43E-05       | 0.00145771      |
| Viral myocarditis                       | 1.84E-04       | 0.003129081     |
| Adherens junction                       | 2.58E-04       | 0.003438715     |
| Bacterial invasion of epithelial cells  | 3.03E-04       | 0.003438715     |
| Leukocyte transendothelial migration    | 6.64E-04       | 0.006448343     |
| Yersinia infection                      | 9.56E-04       | 0.007437068     |
| Fluid shear stress and atherosclerosis  | 9.84E-04       | 0.007437068     |
| Phagosome                               | 0.00117522     | 0.007991495     |
| Tight junction                          | 0.001449643    | 0.008961432     |
| Neutrophil extracellular trap formation | 0.001808145    | 0.010246156     |
| Pathogenic Escherichia coli infection   | 0.001962254    | 0.010264096     |
| Rap1 signaling pathway                  | 0.002225638    | 0.01081024      |
| Regulation of actin cytoskeleton        | 0.002395654    | 0.010860298     |
| Shigellosis                             | 0.00303791     | 0.012911117     |
| MAPK signaling pathway                  | 0.004307241    | 0.017228962     |
| Fatty acid biosynthesis                 | 0.006283878    | 0.023369719     |
| Amyotrophic lateral sclerosis           | 0.006529775    | 0.023369719     |
| Ferroptosis                             | 0.014264049    | 0.048497766     |

**Supplementary Table 3. The detailed information of GO enrichment analysis in Figure 6H.**

| <b>ONTOLOGY</b> | <b>ID</b>  | <b>Description</b>                                                  | <b>p-value</b> | <b>p.adjust</b> |
|-----------------|------------|---------------------------------------------------------------------|----------------|-----------------|
| BP              | GO:0019221 | cytokine-mediated signaling pathway                                 | 4.02E-08       | 0.000115189     |
| BP              | GO:0030099 | myeloid cell differentiation                                        | 1.13E-07       | 0.000162544     |
| BP              | GO:0032970 | regulation of actin filament-based process                          | 1.21E-06       | 0.00116027      |
| BP              | GO:0046824 | positive regulation of nucleocytoplasmic transport                  | 2.42E-06       | 0.001442425     |
| BP              | GO:0032956 | regulation of actin cytoskeleton organization                       | 2.52E-06       | 0.001442425     |
| BP              | GO:1903706 | regulation of hemopoiesis                                           | 3.25E-06       | 0.001542839     |
| CC              | GO:0005925 | focal adhesion                                                      | 7.45E-09       | 1.22E-06        |
| CC              | GO:0030055 | cell-substrate junction                                             | 9.42E-09       | 1.22E-06        |
| CC              | GO:0070820 | tertiary granule                                                    | 8.85E-06       | 0.000763914     |
| CC              | GO:0101002 | ficolin-1-rich granule                                              | 2.12E-05       | 0.001374605     |
| CC              | GO:0034774 | secretory granule lumen                                             | 0.000190749    | 0.007136597     |
| CC              | GO:0060205 | cytoplasmic vesicle lumen                                           | 0.000204362    | 0.007136597     |
| MF              | GO:0061629 | RNA polymerase II-specific DNA-binding transcription factor binding | 4.26E-06       | 0.001141206     |
| MF              | GO:0003779 | actin binding                                                       | 6.29E-06       | 0.001141206     |
| MF              | GO:0016922 | nuclear receptor binding                                            | 4.47E-05       | 0.003936513     |
| MF              | GO:0140297 | DNA-binding transcription factor binding                            | 5.51E-05       | 0.003936513     |
| MF              | GO:0019903 | protein phosphatase binding                                         | 5.80E-05       | 0.003936513     |
| MF              | GO:0045296 | cadherin binding                                                    | 6.51E-05       | 0.003936513     |
